# Supplementary material
Source: bioRxiv or medRxiv preprint supplement (https://www.biorxiv.org/highwire/filestream/2546/field_highwire_adjunct_files/0/010017-1.pdf)
Supplement: Supplementary file [file 010017-1.pdf]

## Supplemental Information

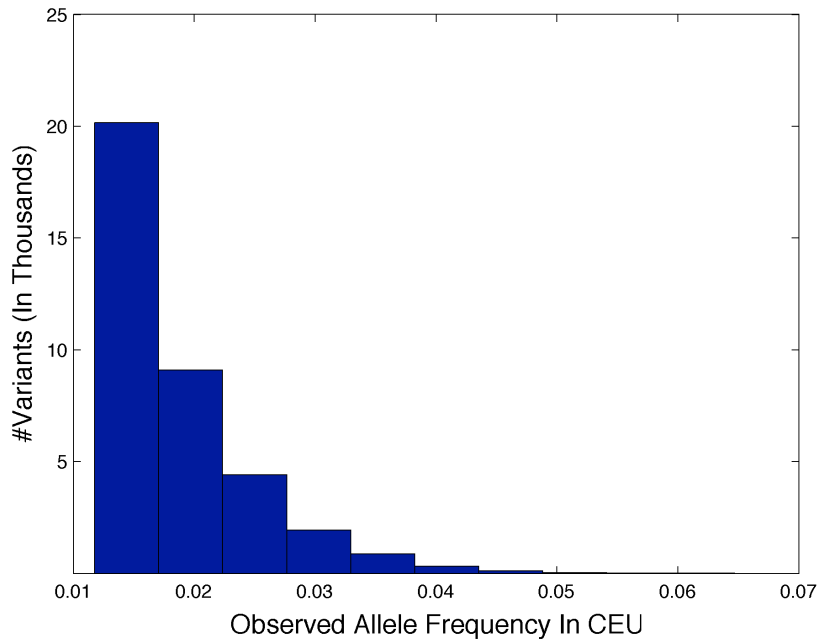

Figure S1: Histogram of variants with allele frequencies  $<1\%$  in 1000 Genomes but  $>1\%$  in the CEU. It shows that allele frequencies can be highly structured for rare variants and that by averaging across too many genetically dissimilar populations can have a downwardly bias affect on frequency estimates of alleles present in a given population.

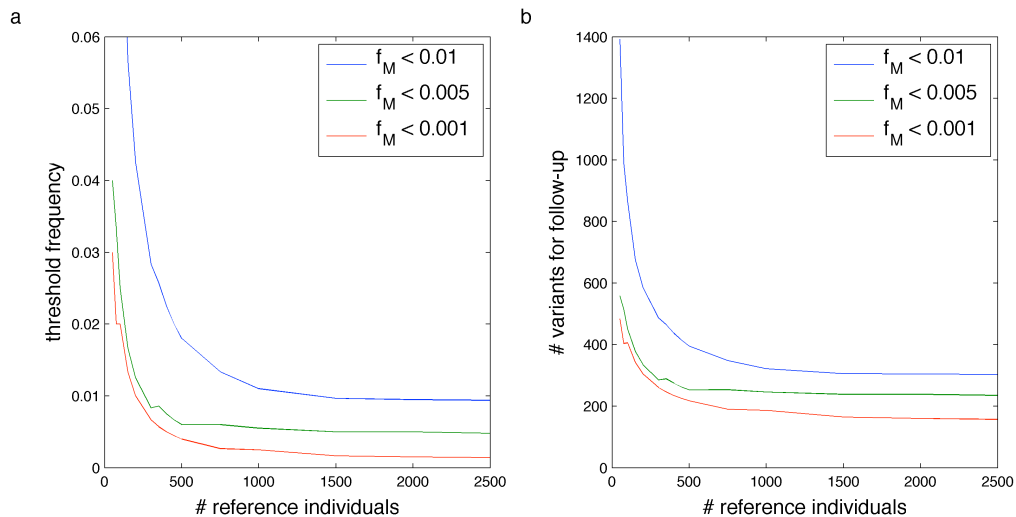

Figure S2: Reference panel size impacts the efficacy of filtering in exome sequencing in African-American simulations from the EVS data.

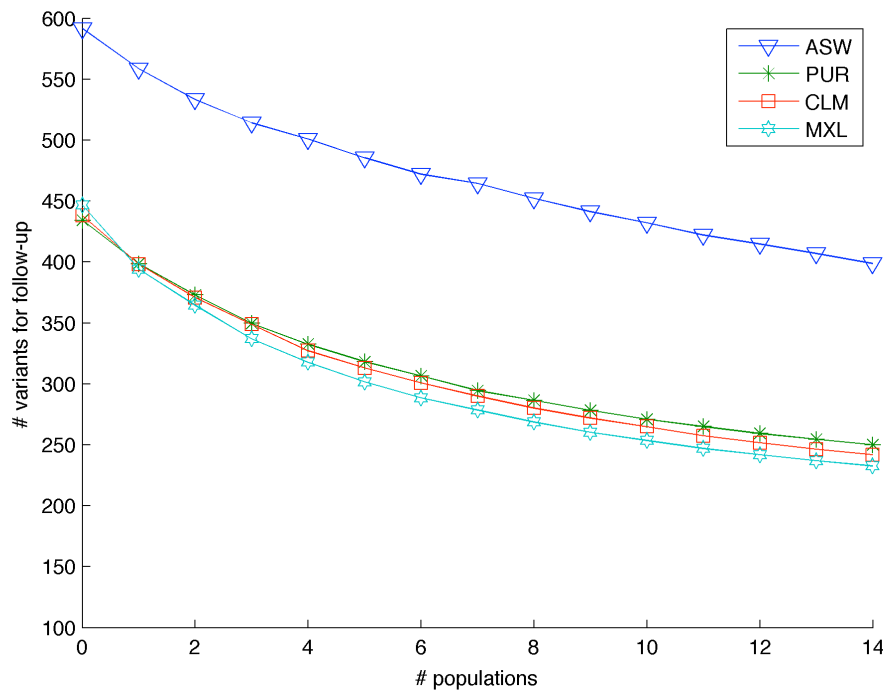

Figure S3. Average number of variants for follow-up in the ASW, CLM, PUR and MXL when leveraging cross-population information. The number of variants for follow-up after this filtering for each of the legend populations is shown along the Y-axis of the graph. Further filtering removed alleles if they were observed in any of the additional populations above the 5% FNR threshold determined for those populations. The number of randomly selected populations on which this filtering is based is given in the x-axis.

| Individual | Country | Inheritance | Causal Variant zygosity | Variants Remaining Pre-Frequency Filtering | No Ancestry, f>1% | PopMatched, FNR <5% | AllPop, FNR <5% |
|------------|---------|-------------|-------------------------|--------------------------------------------|-------------------|---------------------|-----------------|
| 1          | Jordan  | Recessive   | Homozygous              | 5016                                       | 65                | 43                  | 30              |
| 2          | Turkey  | Recessive   | Homozygous              | 5049                                       | 50                | 20                  | 19              |
| 3          | Turkey  | Recessive   | Homozygous              | 4752                                       | 25                | 23                  | 19              |
| 4          | Iran    | Recessive   | Homozygous              | 4674                                       | 39                | 15                  | 11              |
| 5          | Syria   | Recessive   | Homozygous              | 4751                                       | 26                | 18                  | 16              |
| 6          | Tunisia | None Given  | Homozygous              | 4834                                       | 37                | 19                  | 11              |
| 7          | Jordan  | Recessive   | Homozygous              | 4722                                       | 22                | 11                  | 4               |
| 8          | Jordan  | Recessive   | Homozygous              | 4973                                       | 104               | 102                 | 52              |
| 9          | Iran    | None Given  | Homozygous              | 5653                                       | 112               | 67                  | 48              |
| 10         | Jordan  | None Given  | Homozygous              | 5938                                       | 97                | 83                  | 63              |

|    |         |            |                          |       |     |     |     |
|----|---------|------------|--------------------------|-------|-----|-----|-----|
| 11 | Jordan  | None Given | Heterozygous             | 15694 | 872 | 750 | 498 |
| 12 | Turkey  | Recessive  | Heterozygous             | 12171 | 619 | 445 | 342 |
| 13 | Tunisia | Dominant   | Heterozygous             | 14111 | 813 | 747 | 461 |
| 14 | Iran    | Dominant   | Heterozygous             | 13727 | 726 | 535 | 421 |
| 15 | Iran    | Dominant   | Heterozygous             | 13417 | 661 | 512 | 379 |
| 16 | Jordan  | None Given | Heterozygous             | 14713 | 871 | 690 | 511 |
| 17 | Jordan  | None Given | Heterozygous             | 13472 | 668 | 543 | 384 |
| 18 | Jordan  | None Given | Heterozygous             | 13789 | 748 | 623 | 450 |
| 19 | Iran    | None Given | Heterozygous             | 15128 | 769 | 598 | 465 |
| 20 | Turkey  | Recessive  | Compound<br>Heterozygous | 12919 | 604 | 426 | 352 |

Table S1. Analysis of real data by individual exome. Variants remaining pre-frequency filtering reflects the number of variants remaining when all variants without damaging annotations are filtered out and when variants inconsistent with the disorder architecture are removed but before frequency-based filtering has been performed.
